# Supplementary material for: Exploring the transition between water and wind-dominated landscapes in Deep Springs, California as an analog for transitioning landscapes on Mars
Source: Copernicus journal article supplement (doi:10.5194/egusphere-2022-1040), 2022-11-09
Supplement: Supplementary file [file egusphere-2022-1040-AC1-supplement.pdf]

## **Intracrater sediment trapping and transport in Arabia Terra, Mars**

T.C. Dorn and M. D. Day

### **Response to reviewers**

The editor highlights several areas where the manuscript could be improved in clarity and we have incorporated the suggested changes, each of which is described below. The original reviewer comments are shown in black, and **our responses are in red below each comment.**

#### **Comments to the author:**

Please use SI units in the manuscript throughout:

line 81: miles > km

**Units were corrected from miles to kilometers**

lines 181-191 and Fig 2 use Celsius not F

**All units were changed to Celsius in text and in figure 2**

line 311: inches to cm

**Units were changed from inches to cm**

Another two small items:

Line 388 resurfaces should be resurfaced

**Resurfaces was stated in the corrected tense**

line 876: should panel e be the same photo as shown in c?

**Figure was corrected to not have duplicate image in panel “e” and “c”**
